# Supplementary material for: Hole traps and Cu-related shallow donors in ZnO nanorods revealed by temperature-dependent photoluminescence
Source: Royal Society of Chemistry journal article supplement (doi:10.1039/c3cp50764e), 2013-01-01
Supplement: c3cp50764e.pdf [file c3cp50764e.pdf]

## Supplementary Information

Hole traps and Cu-related shallow donors in ZnO nanorods revealed  
by temperature-dependent photoluminescence

Haiping He\*, Shuili Li, Luwei Sun, and Zhizhen Ye

*State Key Laboratory of Silicon Materials, Department of Materials Science and Engineering, Zhejiang University, Hangzhou 310027, People's Republic of China.*

E-mail: hphe@zju.edu.cn (H. P. He)

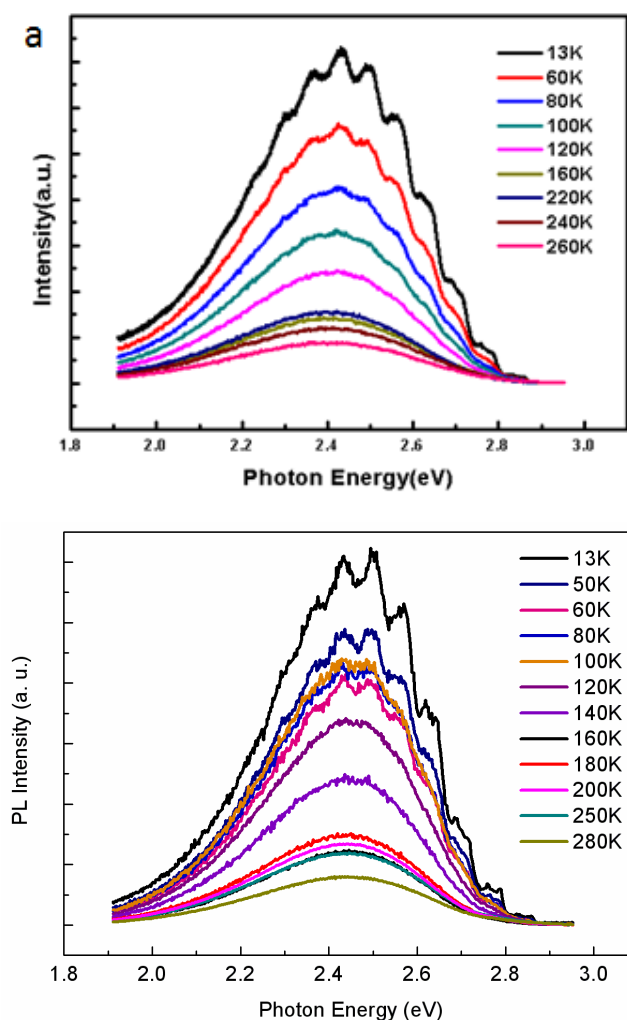

**Fig. S1** Temperature-dependent PL spectra of structured green emission in (a) as-grown and (b) 800°C-annealed ZnO nanorods.
